# Supplementary material for: Dual additives enabling high-performance solid polymer electrolytes for stable cycling of lithium metal batteries
Source: Royal Society of Chemistry journal article supplement (doi:10.1039/d4cc06443g), 2025-01-01
Supplement: d4cc06443g1.pdf [file d4cc06443g1.pdf]

1 Dual Additives Enabling High-Performance Solid Polymer  
2 Electrolytes for Stable Cycling of Lithium Metal Batteries

3 Mochun Zhang <sup>a</sup>, Yuting Hu <sup>a</sup>, Jing Xu <sup>a</sup>, Junquan Lai <sup>a</sup>, Jialong Cao <sup>a</sup>, Mengran Wang <sup>\* a, b, c, d, e</sup> and  
4 Yanqing Lai <sup>a, b, c, e</sup>

5

6 <sup>a</sup> School of Metallurgy and Environment, Central South University, Changsha 410083, Hunan, China,

7 E-mail: mengranwang93@163.com, laiyanqing@csu.edu.cn

8 <sup>b</sup> Engineering Research Centre of Advanced Battery Materials, The Ministry of Education, Changsha

9 410083, Hunan, China

10 <sup>c</sup> National Energy Metal Resources and New Materials Key Laboratory, Changsha, Hunan 410083,

11 China

12 <sup>d</sup> National Engineering Research Center of Advanced Energy Storage Materials, Changsha, Hunan

13 410083, China

14 <sup>e</sup> Hunan Provincial Key Laboratory of Nonferrous Value-Added Metallurgy, Changsha, Hunan 410083,

15 China

16

17 \* Corresponding author

18 Email addresses: mengranwang93@163.com (Mengran Wang)

19

## 1 **1.Experimental section**

### 2 **Materials**

3 lithium bis(trifluoromethanesulfonyl)imide (LiTFSI, 99.9%), Vinyl ethylene carbonate (VEC, 99%),  
4 2,2,2-trifluoroethyl methacrylate (TFEMA, 98%), polyethylene glycol dimethacrylate (PEGDMA)  
5 crosslinker, 2,2'-Azobis(2methylpropionitrile) (AIBN), Copper fluoride (CuF<sub>2</sub>, anhydrous), Lithium  
6 bis(oxalato)borate (LiBOB), N-methyl-2-pyrrolidone (NMP, 99.9%) were all purchased from Shanghai  
7 Aladdin Biochemical Technology Co., Ltd. Glass fiber (Whatman GF/C) separators were procured from  
8 Duoduochem. Carbon black and PVDF (99.5%) were obtained from Taiyuan Liyuan Lithium  
9 Technology Center. lithium cobalt oxide (LCO) was sourced from the Shenzhen Kejing Star Technology  
10 Co., Ltd. All the materials were stored in an Ar-filled glove box (H<sub>2</sub>O < 0.1 ppm, O<sub>2</sub> < 0.1 ppm).

11

### 12 **Preparation of PVT electrolyte**

13 A specified amount of VEC, TFEMA, PEGDMA (crosslinker), and LiTFSI was weighed and  
14 transferred into a glass vial, which was placed on a magnetic stirrer for approximately 30 minutes.  
15 After stirring, AIBN (thermal initiator, 1.0 wt.% relative to the total mass of the two monomers) was  
16 added, followed by an additional 10 minutes of stirring to obtain the precursor solution. The prepared  
17 solution was injected into a cell, which was then heated at 80°C for 8 hours and 60°C for 16 hours.  
18 After polymerization, the cell was allowed to cool to room temperature for at least 1 hour before  
19 performance testing.

20

### 21 **Preparation of PVT-C electrolyte**

22 Building on the PVT polymer electrolyte, varying amounts of copper fluoride (0.25 wt.%, 0.5  
23 wt.%, 0.75 wt.%, and 1.0 wt.%, relative to the combined mass of the two monomers VEC and TFEMA)  
24 were added and stirred for at least 8 hours. Once copper fluoride was fully dissolved,  
25 azodiisobutyronitrile (AIBN, thermal initiator, 1.0 wt.% relative to the total mass of VEC and TFEMA)  
26 was introduced, and the mixture was stirred for an additional 10 minutes to yield the precursor slurry.

27

### 28 **Preparation of PVT-CB electrolyte**

29 For the PVT-C polymer electrolyte, different amounts of LiBOB (0.5 wt.%, 1.0 wt.%, 1.5 wt.%, and  
30 2.0 wt.% relative to the total mass of the two monomers VEC and TFEMA) were incorporated and

1 stirred for at least 8 hours. After  $\text{CuF}_2$  and LiBOB were completely dissolved, AIBN (1.0 wt.% relative  
2 to the total mass of the two monomers) was added, and the precursor slurry was obtained after an  
3 additional 10 minutes of stirring.

4

## 5 **Materials characterization**

6 In situ Fourier transform infrared spectroscopy (FTIR) was employed to analyze the functional  
7 group changes of the electrolytes before and after polymerization, enabling the assessment of  
8 polymerization success. FTIR measurements were conducted using a Nicolet iS50 instrument  
9 (Thermo Fisher Technology), with an infrared spectral range of  $400\text{--}4000\text{ cm}^{-1}$ . Both the monomer  
10 and the prepared solid electrolyte were tested in a room temperature air atmosphere.

11 Thermogravimetric analysis (TGA) was used to investigate the thermal stability of the solid  
12 electrolytes. The thermal analysis was performed using an STA 449 F5 Jupiter instrument (Netz  
13 Instrument Manufacturing, Germany) with a test temperature range of  $30\text{--}600\text{ }^\circ\text{C}$ , a heating rate of  
14  $10\text{ }^\circ\text{C min}^{-1}$ , and a nitrogen atmosphere.

15 X-ray diffraction (XRD) was employed to determine the crystallinity of the solid electrolyte. XRD  
16 measurements were carried out with a Rui Ying 2Empyrean 2 instrument (PANalytical, Netherlands)  
17 using a copper target, with an angle range of  $10^\circ$  to  $80^\circ$  and a sweep speed of  $10^\circ\text{ min}^{-1}$ .

18 Differential scanning calorimetry (DSC) was utilized to measure the glass transition temperature  
19 ( $T_g$ ) of the polymer solid electrolyte. The DSC analysis was performed using a Mettler DSC3  
20 instrument (Mettler Toledo, Switzerland), under nitrogen atmosphere, with a heating rate of  $5\text{ }^\circ\text{C}$   
21  $\text{min}^{-1}$  and a temperature range from  $-80$  to  $200\text{ }^\circ\text{C}$ , without insulation.

22 Scanning electron microscopy (SEM) was used to examine the microstructure of the polymer  
23 solid electrolyte and electrode plates. An energy dispersive X-ray spectrometer (EDS) was also  
24 employed to investigate the elemental distribution on the surface of materials through point  
25 scanning, line scanning, and surface scanning. The SEM instrument used was a TESCAN CLARA model.

26 Transmission electron microscopy (TEM) was used to observe the ultrastructure of the materials,  
27 particularly the active material properties of the recycled lithium cobalt oxide electrode. The TEM  
28 measurements were conducted with a JEM-F200 instrument (JEOL, Japan).

29 X-ray photoelectron spectroscopy (XPS) was used to analyze the chemical states and molecular  
30 structures of elements on the material's surface, particularly to examine the composition of the

1 interface layer on the cathode and anode after cycling. The XPS analysis was performed using an  
2 ESCALAB 250Xi instrument (Thermo Fisher Scientific).

3

#### 4 **Electrochemical characterization**

5 The steel symmetric battery was assembled in a glove box, and electrochemical impedance  
6 spectroscopy (EIS) was conducted using a Gamry instrument to measure the impedance of the battery.  
7 Afterward, the steel symmetric battery was disassembled, and the thickness of the in-situ  
8 polymerized solid electrolyte film was measured. The ionic conductivity ( $\sigma$ ) of the electrolyte was  
9 then calculated using the following formula:

$$\sigma = \frac{L}{RS}$$

10

11 Where the  $\sigma$  represents the ion conductivity of electrolyte, L is the thickness of electrolyte, R is  
12 the impedance, and S is the effective area of the electrolyte.

13 The activation energy is the energy barrier that lithium ions must overcome during internal  
14 migration within the battery. The ion conductivity ( $\sigma$ ) of different temperatures was fitted into the  
15 Arrhenius model to calculate the activation energy ( $E_a$ ) of PVT, PVT-C and PVT-CB electrolytes. The  
16 formula is as follows:

$$\sigma(T) = A \exp\left(-\frac{E_a}{RT}\right)$$

17

18 Where  $E_a$  is the activation energy, A is the pre-exponential factor, and R is the ideal gas constant  
19 ( $8.314 \text{ J mol}^{-1} \text{ K}^{-1}$ )

20 The calculation of lithium-ion transference number ( $t_{Li^+}$ ) was determined by assembling lithium  
21 symmetric batteries Li|SPEs|Li. Chronoamperometry was performed by applying a constant voltage  
22 of 10 mV, and the impedance in the frequency range of 0.1 Hz to 1 MHz was recorded before and  
23 after the test. The lithium-ion transference number was calculated using the following formula:

$$t_{Li^+} = \frac{I_{SS}(\Delta V - I_0 R_0)}{I_0(\Delta V - I_{SS} R_{SS})}$$

24

25 Where  $\Delta V$  is the polarization voltage,  $I_0$  and  $I_{SS}$  represent the initial and steady-state currents,  
26 and  $R_0$  and  $R_{SS}$  are the interfacial impedances before and after polarization, respectively.

27 To evaluate the interfacial stability of the electrolytes with the electrodes, batteries based on

1 SS|SPE|Li were tested using linear sweep voltammetry (LSV). The voltage sweep was applied from 3  
2 V to 6 V at a sweep rate of  $1 \text{ mV s}^{-1}$ .

3 The galvanostatic charge-discharge performance of the batteries based on Li|SPEs|Li was tested  
4 using a LAND battery test system with a current density of  $0.1 \text{ mA cm}^{-2}$ . Additionally, to evaluate the  
5 stripping and deposition behavior of the lithium metal anode, tests were conducted at different  
6 current densities. For the Li|SPEs|LCO batteries, the cycling stability was assessed with charge and  
7 discharge voltages set between 3.0 and 4.4 V, using the same LAND battery test system.

## 8 Computational method

9 All quantum chemical calculations were carried out using dmol3 software package based on  
10 density functional theory (DFT) method. The B3LYP functional were adopted for all the geometry  
11 optimizations. The SCF tolerance was set to  $1 \times 10^{-6}$  hartree. In the process of geometry optimization,  
12 all atomic coordinates were relaxed without any limitation. The maximum force is  $0.002 \text{ hartree/\AA}$ ,  
13 max atom displacement is  $0.005 \text{ \AA}$  and max-energy difference is  $1 \times 10^{-5}$  hartree/atom.

14

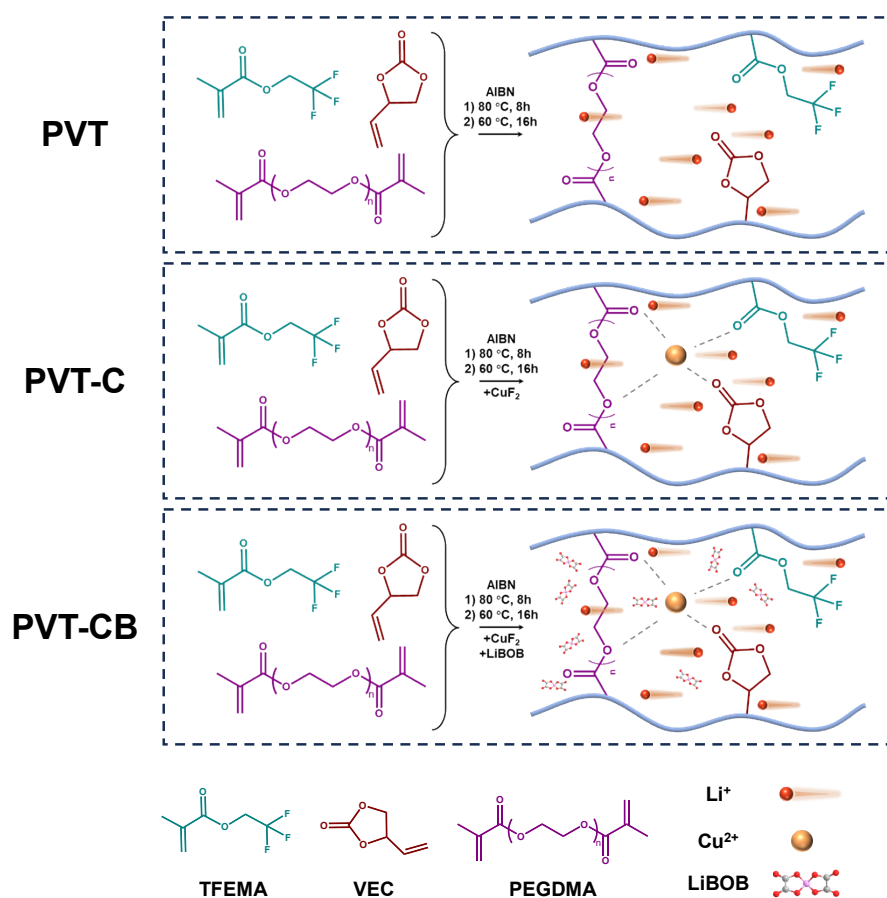

15

16 **Fig. S1** Synthesis diagram of three polymer electrolytes.

1

2

3 **Fig. S2** Optical images of PVT-CB and PVT-C polymer electrolytes under folding and recover states.

4

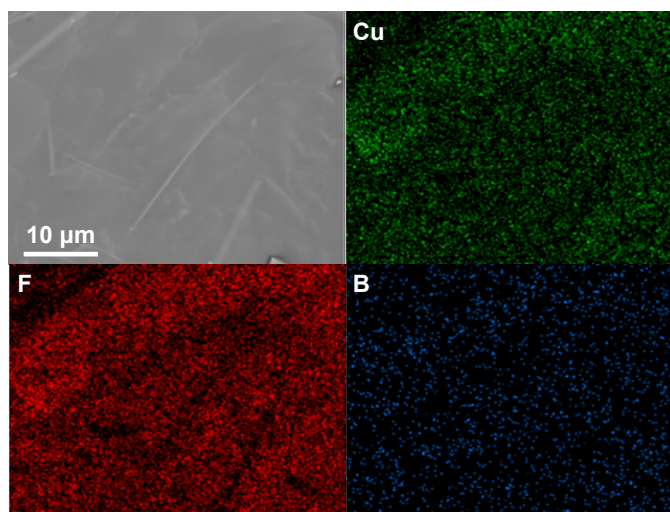

5

6 **Fig. S3** The SEM image and the corresponding EDS mappings of PVT-CB electrolyte.

7

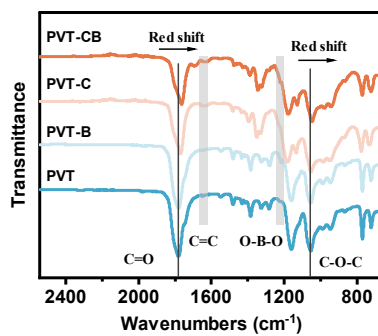

8

9 **Fig. S4** The FTIR spectra of PVT, PVT-B, PVT-C and PVT-CB electrolytes without LiTFSI.

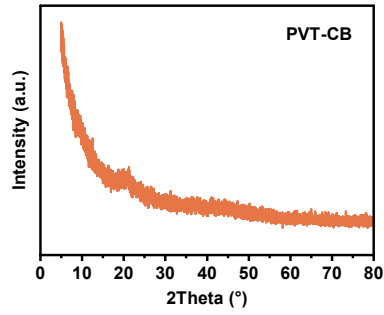

1  
2 **Fig. S5** The XRD spectra of PVT-CB electrolyte.

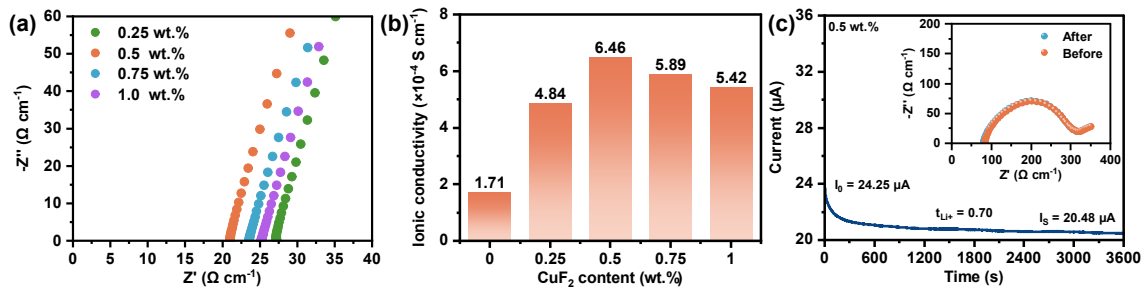

3  
4  
5 **Fig. S6** (a) Impedance spectra and (b) ionic conductivity diagrams (25 °C) of PVT-C with different CuF<sub>2</sub>  
6 contents. (c) Li-ion transference number of PVT-C.

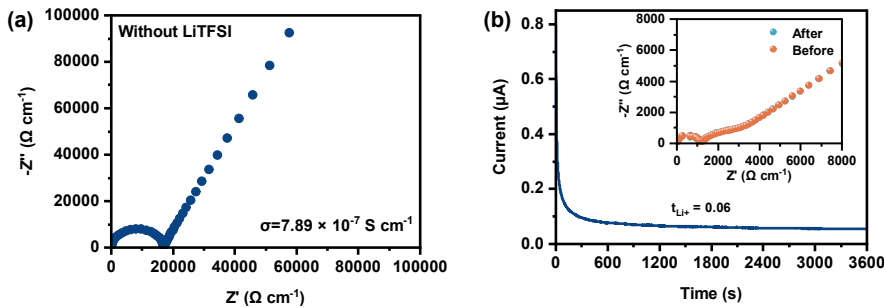

7  
8  
9 **Fig. S7** (a) Conductivity and (b) Li-ion transference number of PVT-C without LiTFSI.

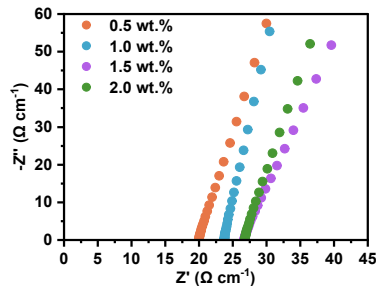

10  
11 **Fig. S8** Impedance spectra of PVT-CB with different LiBOB contents.

12

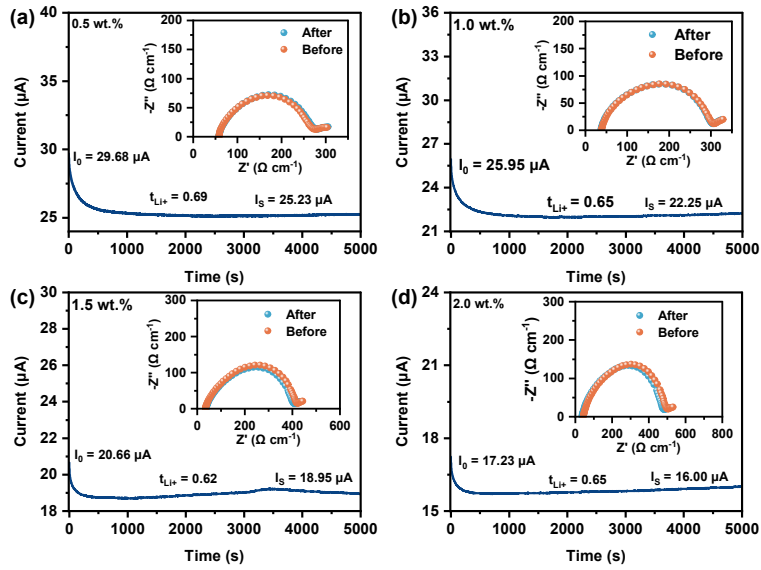

1  
 2 **Fig. S9** The ionic transfer number of PVT-CB electrolyte with different LiBOB contents. (a) 0.5 wt.%,  
 3 (b) 1.0 wt.%, (c) 1.5 wt.%, (d) 2.0 wt.%.

4

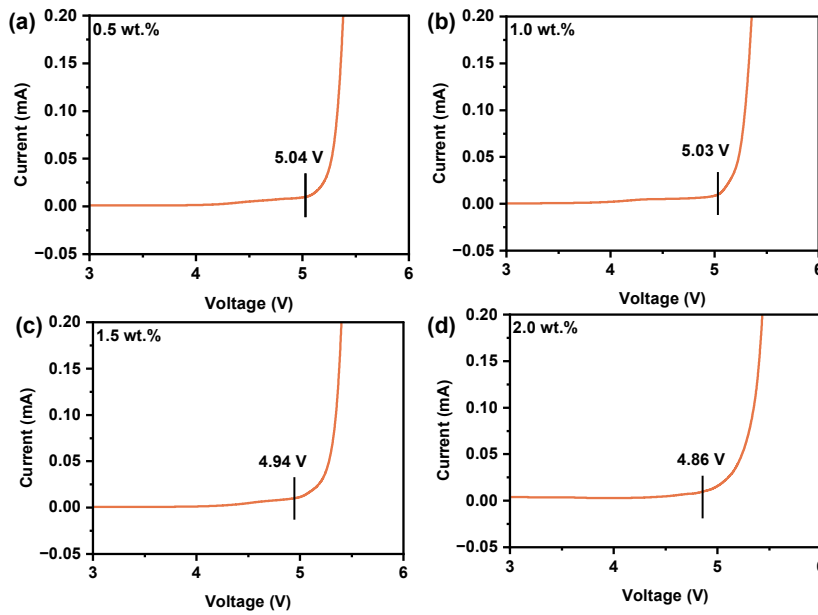

5  
 6 **Fig. S10** LSV cruves of PVT-CB electrolyte with different LiBOB contents. (a) 0.5 wt.%, (b) 1.0 wt.%, (c)  
 7 1.5 wt.%, (d) 2.0 wt.%.

8

9



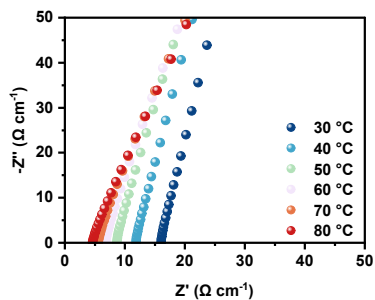

1

2 **Fig. S11** EIS curves of PVT-CB with varying temperatures.

3

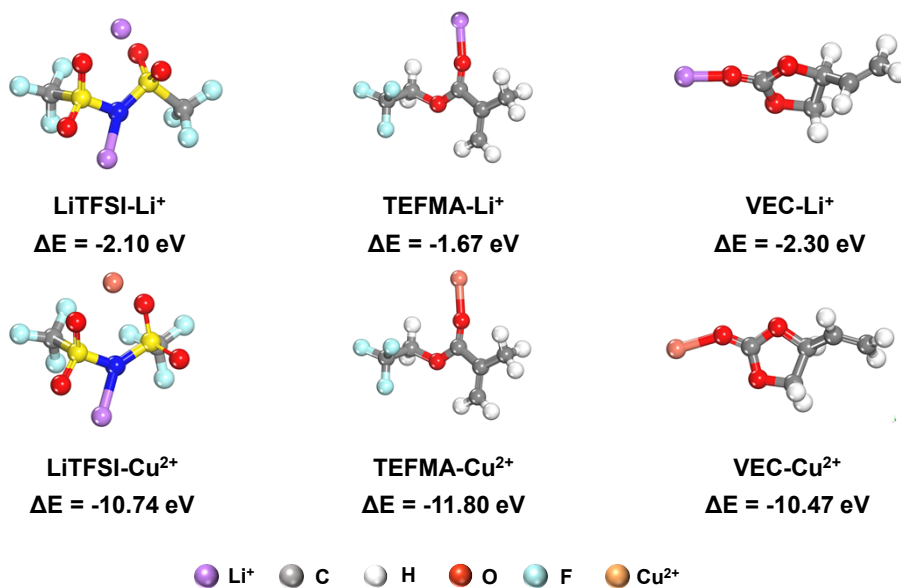

4

5 **Fig. S12** Structures and binding energies of LiTFSI-Li<sup>+</sup>/Cu<sup>2+</sup>, TEFMA-Li<sup>+</sup>/Cu<sup>2+</sup>, and VEC-Li<sup>+</sup>/Cu<sup>2+</sup>  
6 calculated by DFT. Among them, the binding energy of VEC-Li<sup>+</sup> and FEMMA-Li<sup>+</sup> can be referred to our  
7 previous work<sup>1</sup>.

8

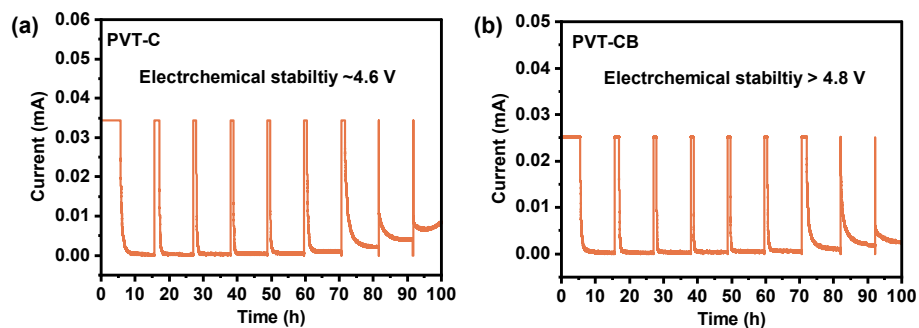

9

10 **Fig. S13** Leakage current tests on Li|PVT-C|LCO and Li|PVT-CB|LCO.

11

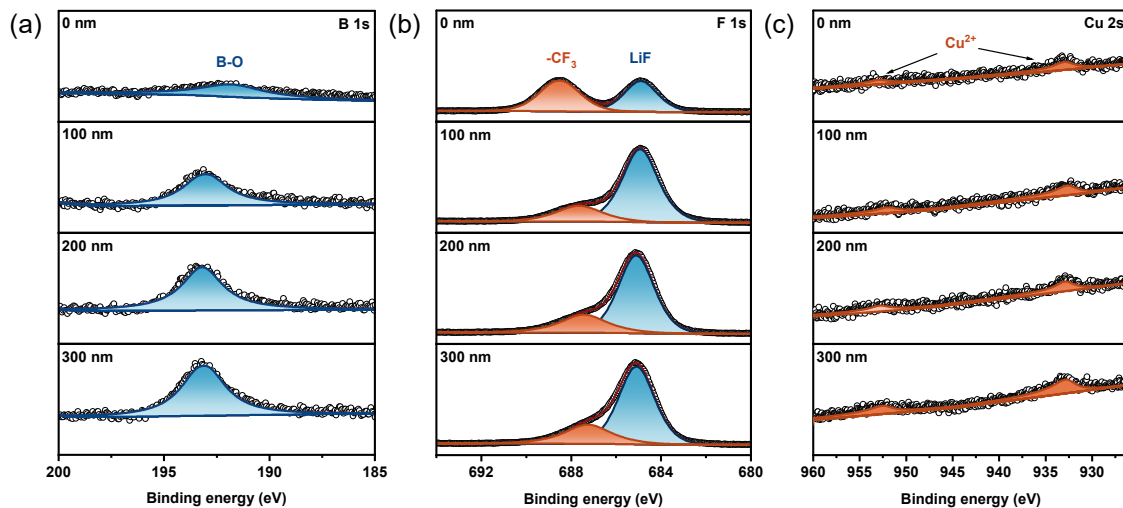

1

2 **Fig. S14** XPS depth profiles with different sputtering time of (a) B 1s, (b) F 1s and (c) Cu 2p in Li metal  
 3 with PVT-CB after 100 h cycles.

4

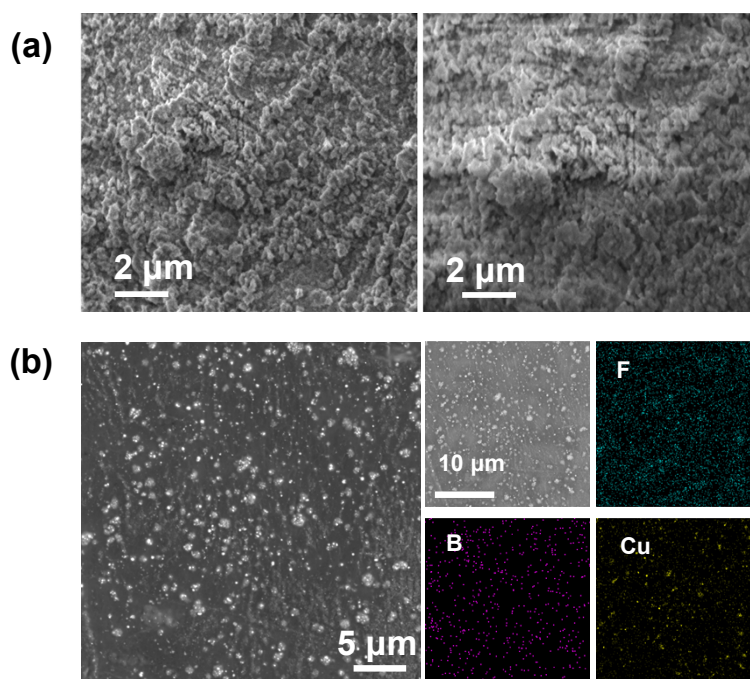

5

6 **Fig. S15** (a) The SEM image of Li metal in Li|PVT|LCO battery after cycled. (b) The SEM image and the  
 7 corresponding EDS mappings of Li metal in Li|PVT-CB|LCO battery after cycled.

8

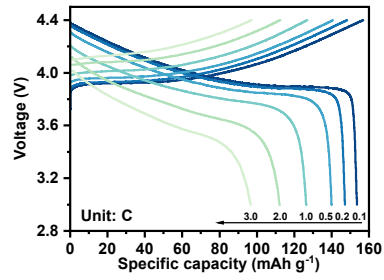

1  
2 **Fig. S16** Charge-discharge voltage profiles at various rates of the Li|PVT-C|LCO battery.

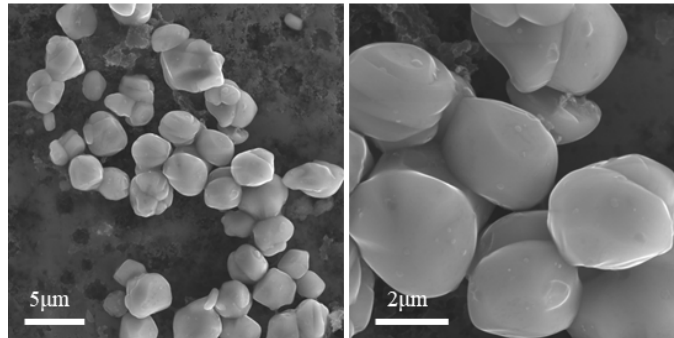

3  
4 **Fig. S17** SEM images of LCO materials in Li|PVT-CB|LCO battery after cycled.

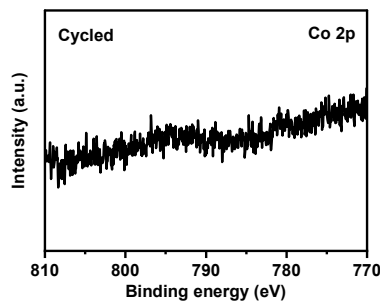

5  
6  
7 **Fig. S18** XPS profile of Co 2p in Li metal with PVT-CB electrolyte and LCO cathode after cycled.

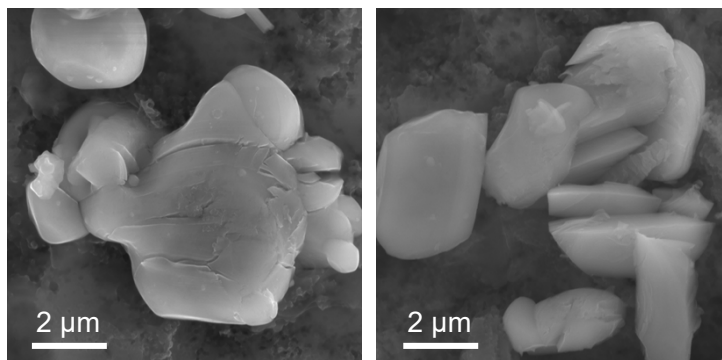

8  
9  
10 **Fig. S19** SEM images of LCO materials in Li|PVT-C|LCO battery after cycled.

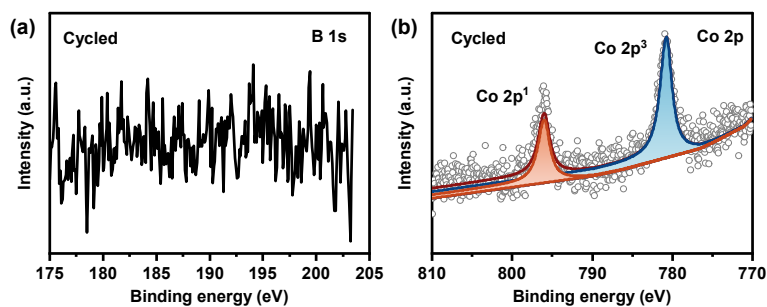

1

2 **Fig. S20** XPS profile of (a) B 1s in LCO cathode and (b) Co 2p in Li metal with PVT-C electrolyte after  
 3 cycled.

4

5 **Table S1.** Comparison of electrochemical performance of PVT-CB electrolyte in comparison with  
 6 other reported polymer electrolytes in Li|LCO battery.

| Name                                               | Voltage window   | Capacity retention | Rate        | Number of cycles | Ref.             |
|----------------------------------------------------|------------------|--------------------|-------------|------------------|------------------|
| CSE-5                                              | 3.0-4.5 V        | 94%                | 0.1C        | 200              | 2                |
| PAL                                                | 3.0-4.3 V        | 81%                | 1C          | 300              | 3                |
| PEO-cPTFBC-LiDFOB                                  | 3.0-4.35 V       | 73.8%              | 0.1C        | 50               | 4                |
| p-MDE-S                                            | 2.5-4.3 V        | 91.6%              | 0.5C        | 50               | 5                |
| C-SPE                                              | 3.0-4.5 V        | 83.9%              | 1C          | 200              | 6                |
| VEC-HEMA                                           | 3.0-4.2V         | 93.5%              | 0.1C        | 100              | 7                |
| P(VEC <sub>1</sub> -CEA <sub>0.3</sub> )/LiTFSI@CE | 3.0-4.45 V       | 88.5%              | 0.2C        | 160              | 8                |
| <b>PVT-CB</b>                                      | <b>3.0-4.4 V</b> | <b>88.8%</b>       | <b>0.5C</b> | <b>250</b>       | <b>This work</b> |

7

8

## 1 Reference

- 2 1. J. Xu, Y. Hu, M. Zhang, et al., *ACS Appl. Energy Mater.*, 2024, **7**, 10777-10783.
- 3 2. Y. Wang, L. Wu, Z. Lin, et al., *Nano Energy*, 2022, **96**, 107105.
- 4 3. L. Wu, Y. Wang, M. Tang, et al., *Energy Storage Mater.*, 2023, **58**, 40-47.
- 5 4. Q. Wang, X. Liu, Z. Cui, et al., *Electrochim. Acta*, 2020, **337**, 135843.
- 6 5. M. Zhang, C. Lei, T. Zhou, et al., *ACS Appl. Mater. Interfaces*, 2022, **14**, 55653-55663.
- 7 6. J. Liu, Y. Zhang, H. Ji, et al., *Adv. Sci.*, 2022, **9**, e2200390.
- 8 7. Y. Huang, Z. Xie, W. Zhu, et al., *ACS Appl. Polym. Mater.*, 2024, **6**, 3624-3636.
- 9 8. S. Ma, Y. Zhang, D. Zhang, et al., *J. Energy Chem.*, 2024, **98**, 422-431.

10
